# Supplementary material for: Association between transmission rate and disease severity for Actinobacillus pleuropneumoniae infection in pigs
Source: PubMed Central journal article supplement (PMC3574036; doi:10.1186/1297-9716-44-2), 2013-01-11

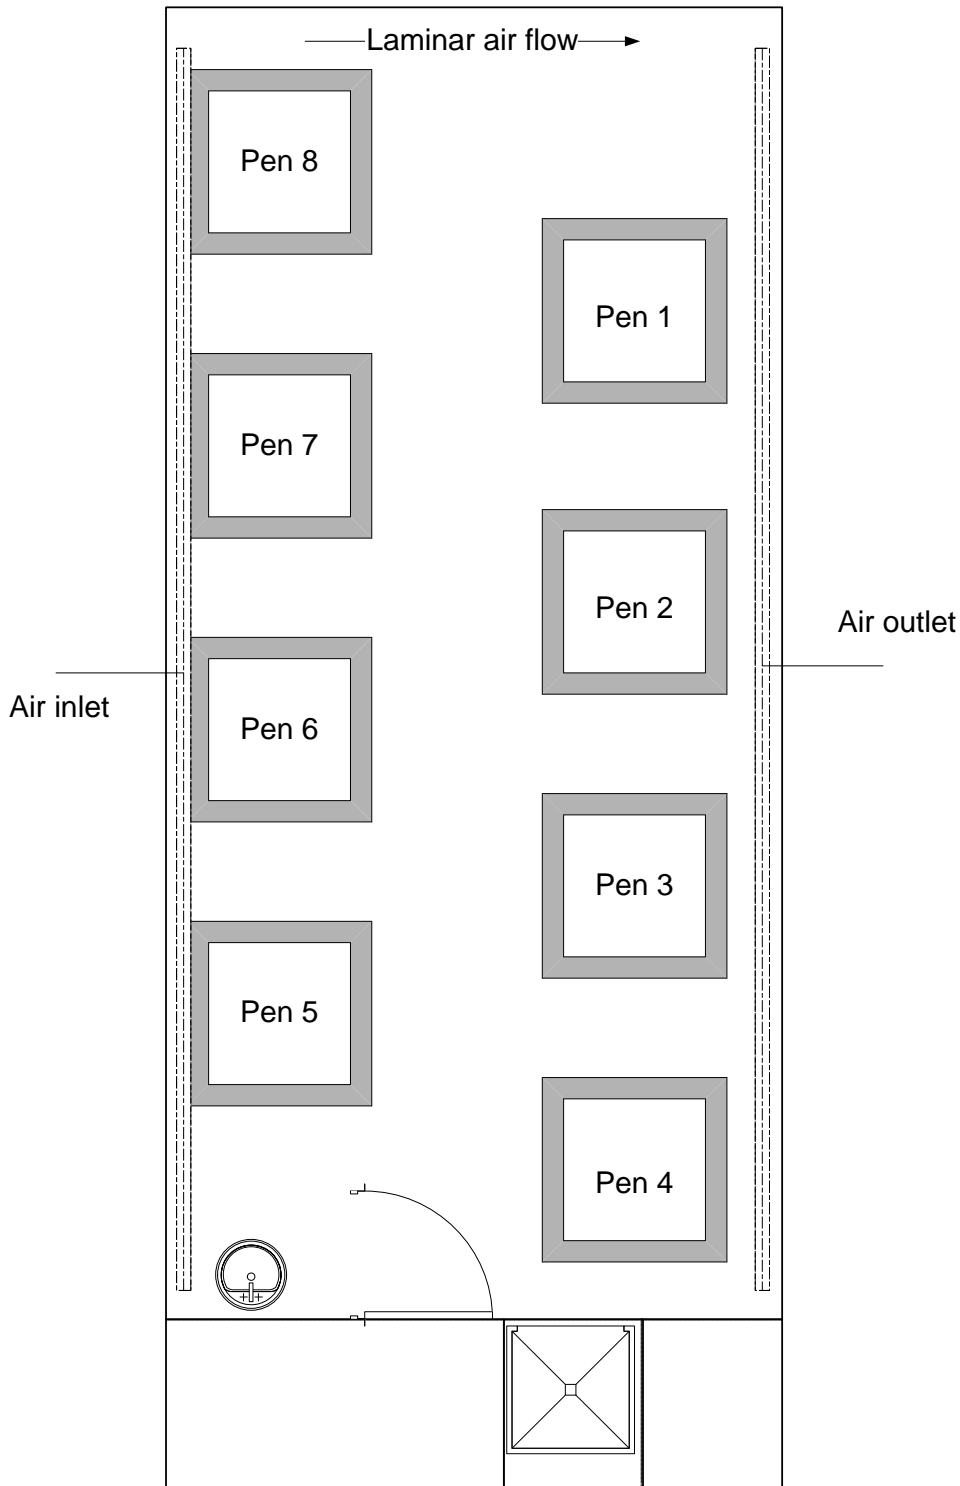

Supplement: 1297-9716-44-2-S1.pdf [file 1297-9716-44-2-S1.pdf]
