# Supplementary material for: Association between transmission rate and disease severity for Actinobacillus pleuropneumoniae infection in pigs
Source: PubMed Central journal article supplement (PMC3574036; doi:10.1186/1297-9716-44-2), 2013-01-11
Supplement: 1297-9716-44-2-S3.pdf [file 1297-9716-44-2-S3.pdf]

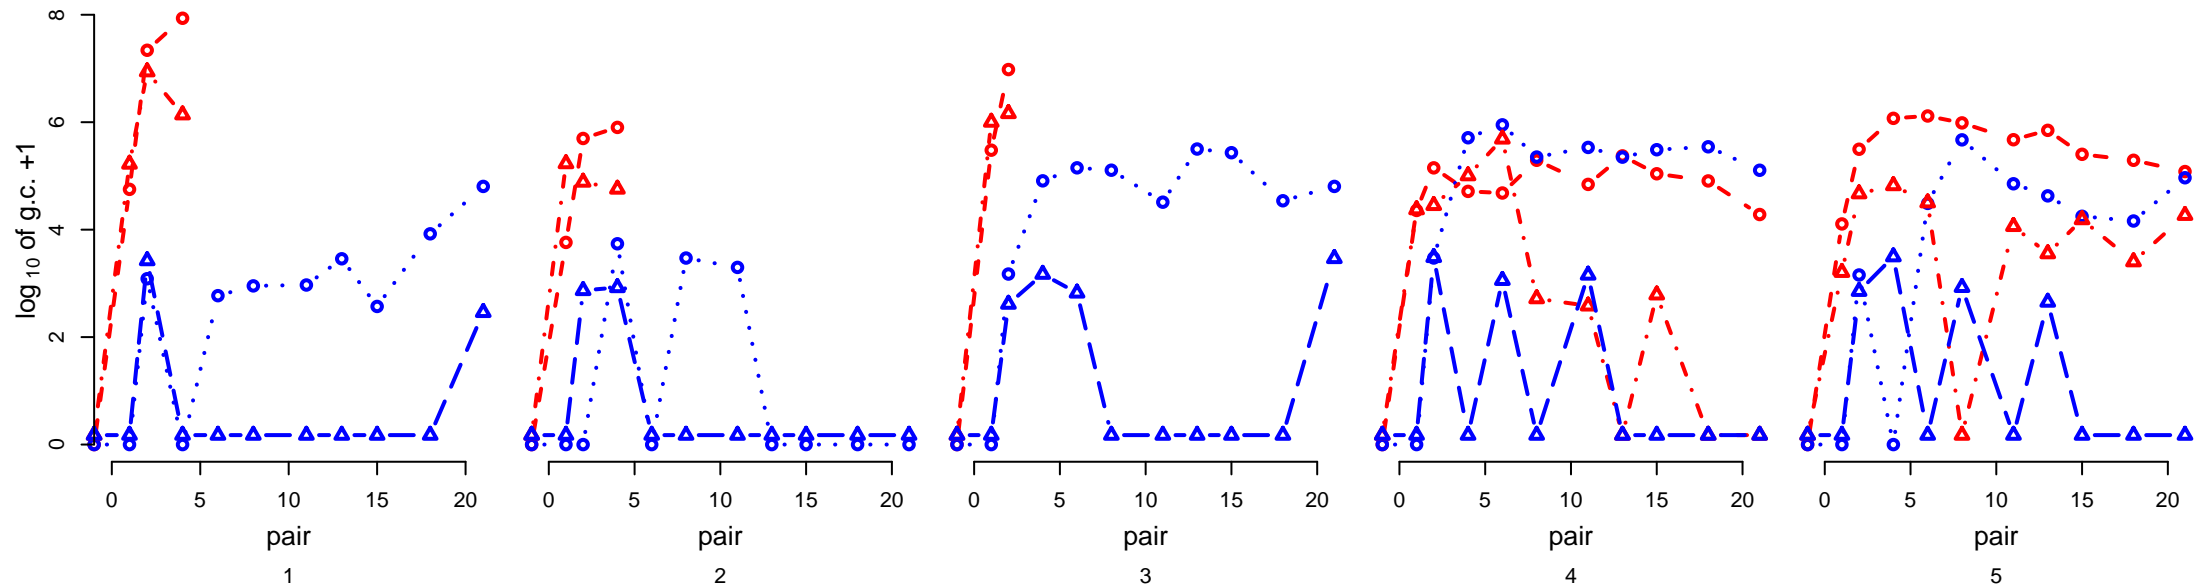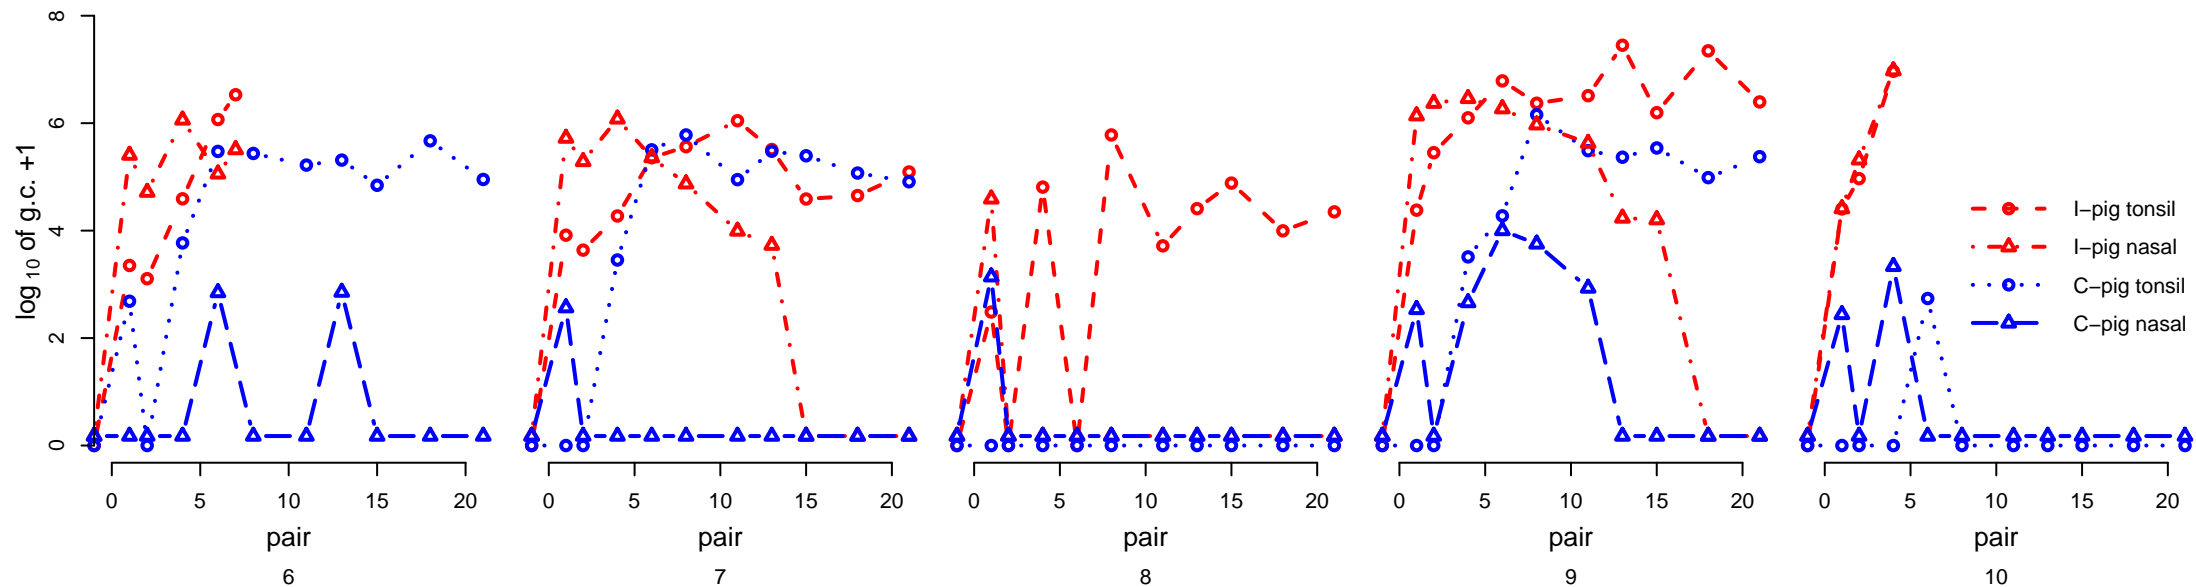

days post inoculation
